# Supplementary material
Source: PubMed Central journal article supplement (PMC549001)

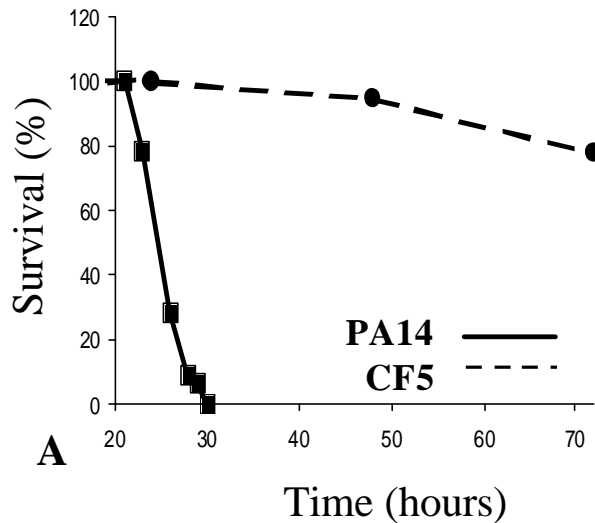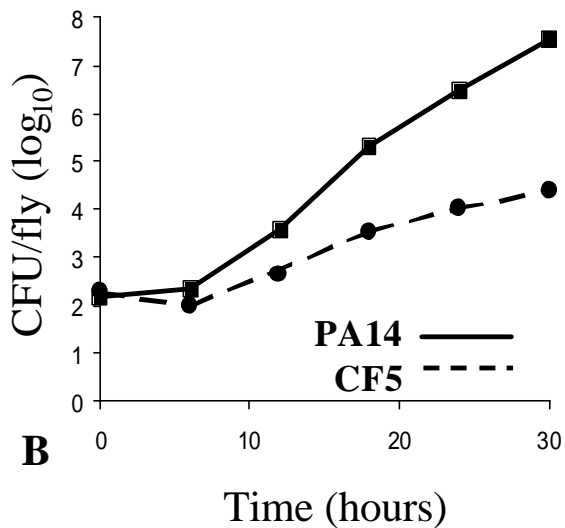

Supplement: pnas_102_7_2573__1.pdf [file pnas_102_7_2573__1.pdf]

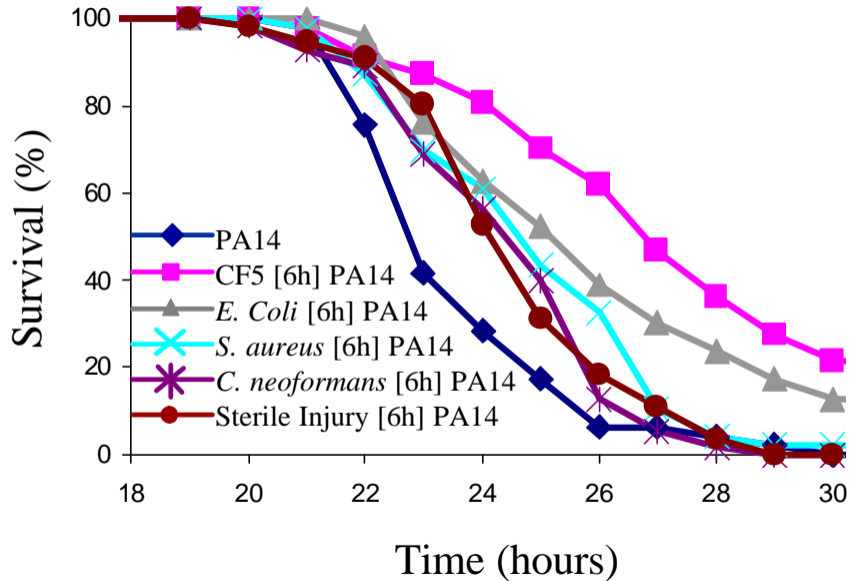

Supplement: pnas_102_7_2573__3.pdf [file pnas_102_7_2573__3.pdf]

A

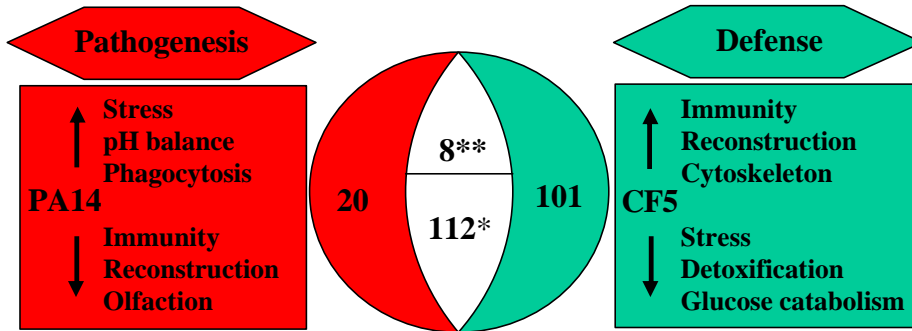

B

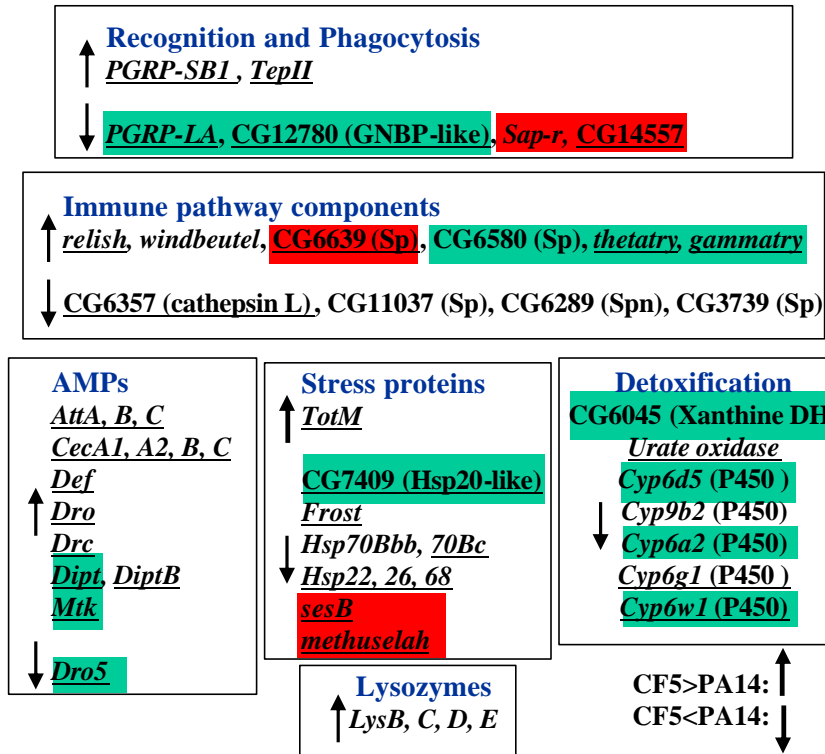

Supplement: pnas_102_7_2573__4.pdf [file pnas_102_7_2573__4.pdf]
